# Supplementary material
Source: PubMed Central journal article supplement (PMC6934093)
Supplement: NIHMS1543681-supplement-1.pdf [file NIHMS1543681-supplement-1.pdf]

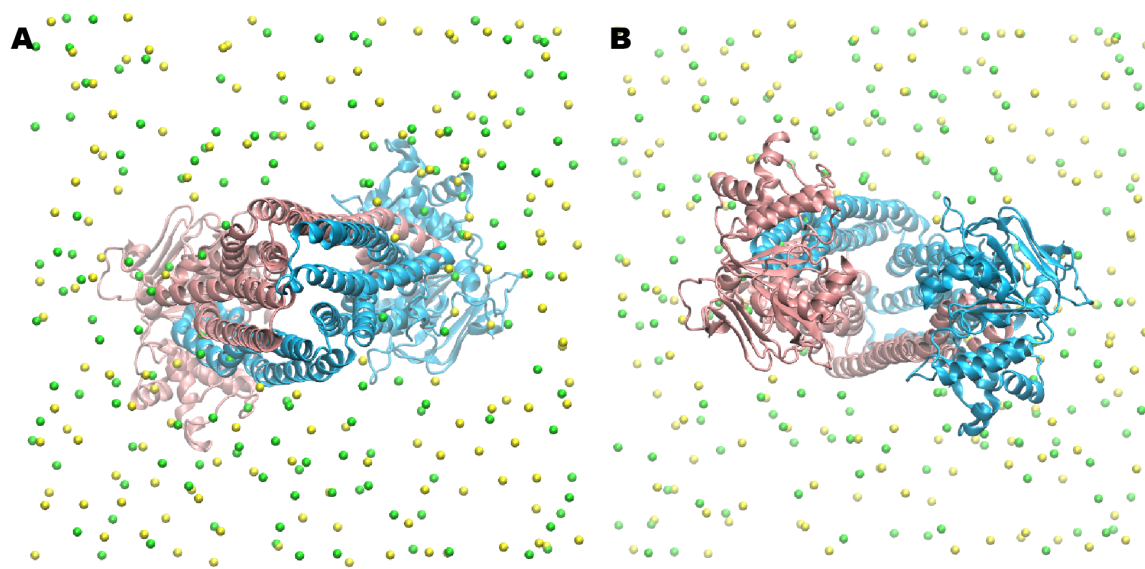

Fig. S1: Initial positions of cholesterol in a POPC:cholesterol (70:30) bilayer from the two independently prepared membrane-Pgp systems. Yellow and green beads represent the position of oxygen atoms of cholesterol molecules in the *apo* and  $Mg^{2+}$ /ATP-bound Pgp systems, respectively, indicating initial randomization of cholesterol positions between the two systems. (A) Top-down view from the extracellular side and (B) bottom-up view from the intracellular side.

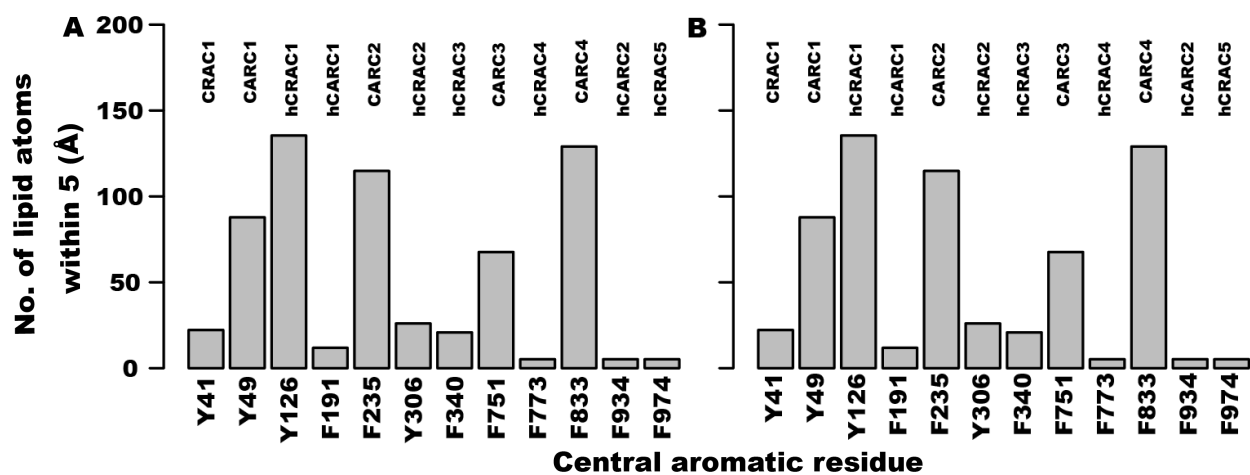

Fig. S2: Membrane accessibility of the identified cholesterol recognition motifs in (A) *apo* and (B)  $Mg^{2+}/ATP$ -bound simulations. The Tyr or Phe residue located in the middle of each recognition motif was selected for these calculations. Y-axis displays the number of lipid atoms located within 5Å of the selected residue and the x-axis displays the selected residue from each motif.

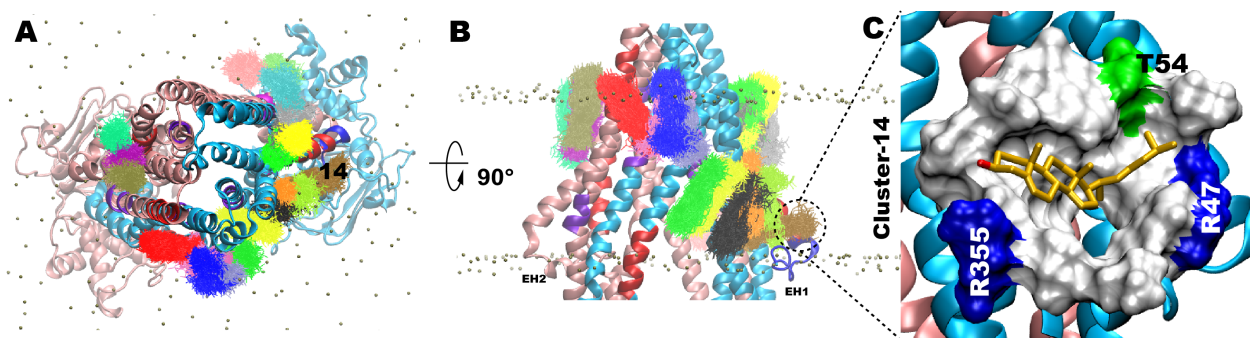

Fig. S3: Clustering analysis of cholesterol molecules located within 4 Å of Pgp obtained using *apo* and  $Mg^{2+}$ /ATP-bound simulations in POPC:cholesterol (70:30) bilayer. (A) Top 20 clusters are displayed and cluster-14 is labeled. (B) Side view of the top 20 clusters from the membrane with elbow helices (EH1 and EH2) labeled. (C) Representative binding mode from the cluster-14 showing an uncommon binding of cholesterol nearly perpendicular to the membrane normal. Residues R47, T54 (both from TM1 and part of CARC1 motif) and R355 (TM6 and located at the TM4/6 portal) are labeled.

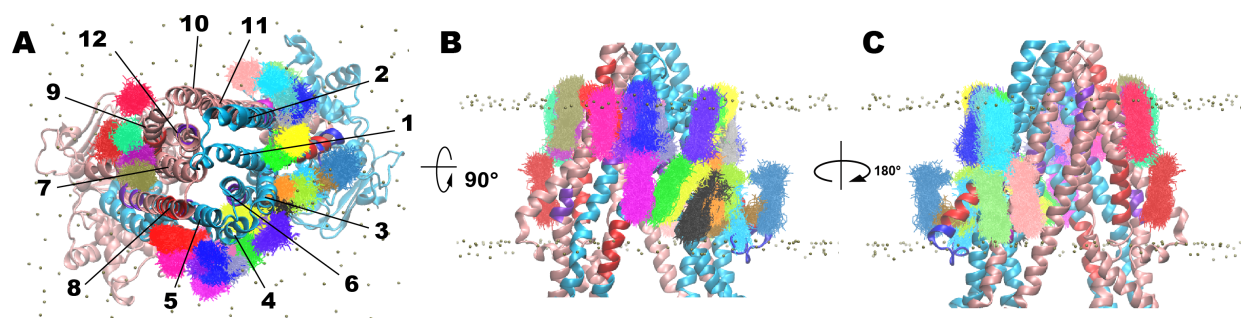

Fig. S4: Clustering analysis of cholesterol molecules located within 4 Å of Pgp obtained using *apo* and  $Mg^{2+}$ /ATP-bound simulations in POPC:cholesterol (70:30) bilayer. (A) Top 30 clusters are colored and TM helices are labeled using black lines. (B and C) Rotated side views of the top 30 clusters from the membrane.

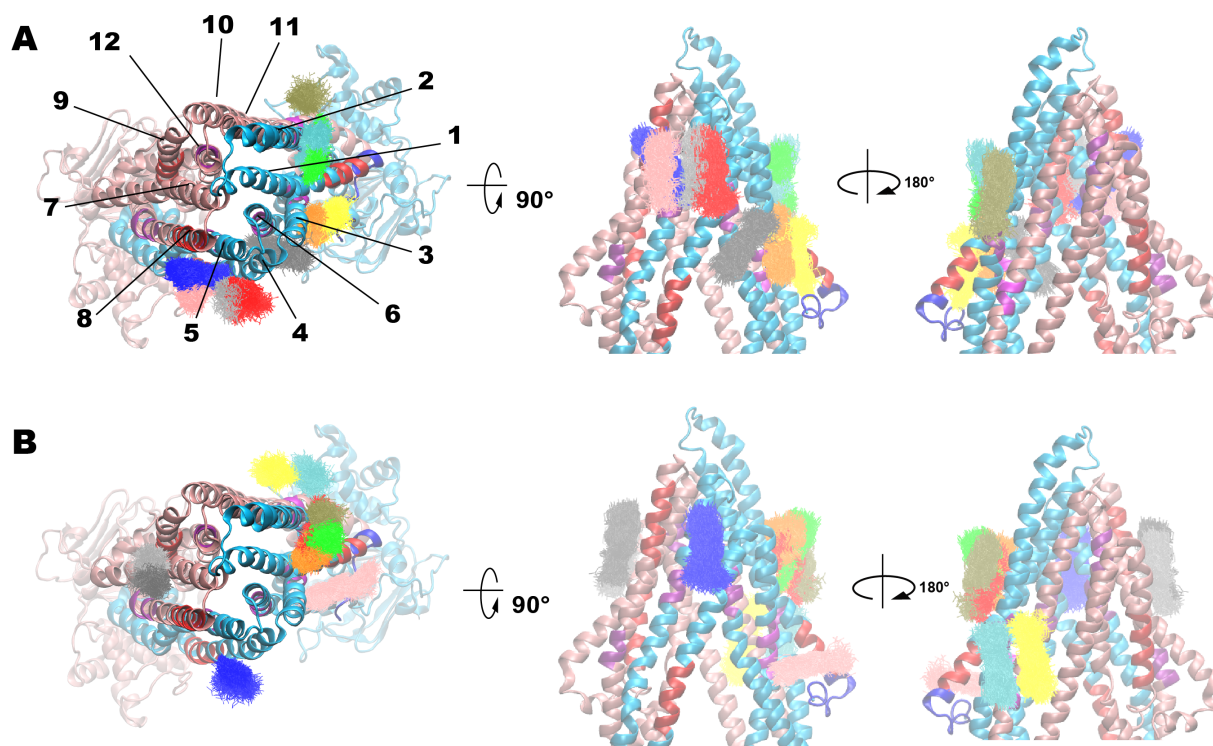

Fig. S5: Comparison of cholesterol clusters between (A)  $Mg^{2+}/ATP$ -bound and (B) *apo* systems. Top 10 clusters are shown from the extracellular side (left) and from the membrane (middle and right).

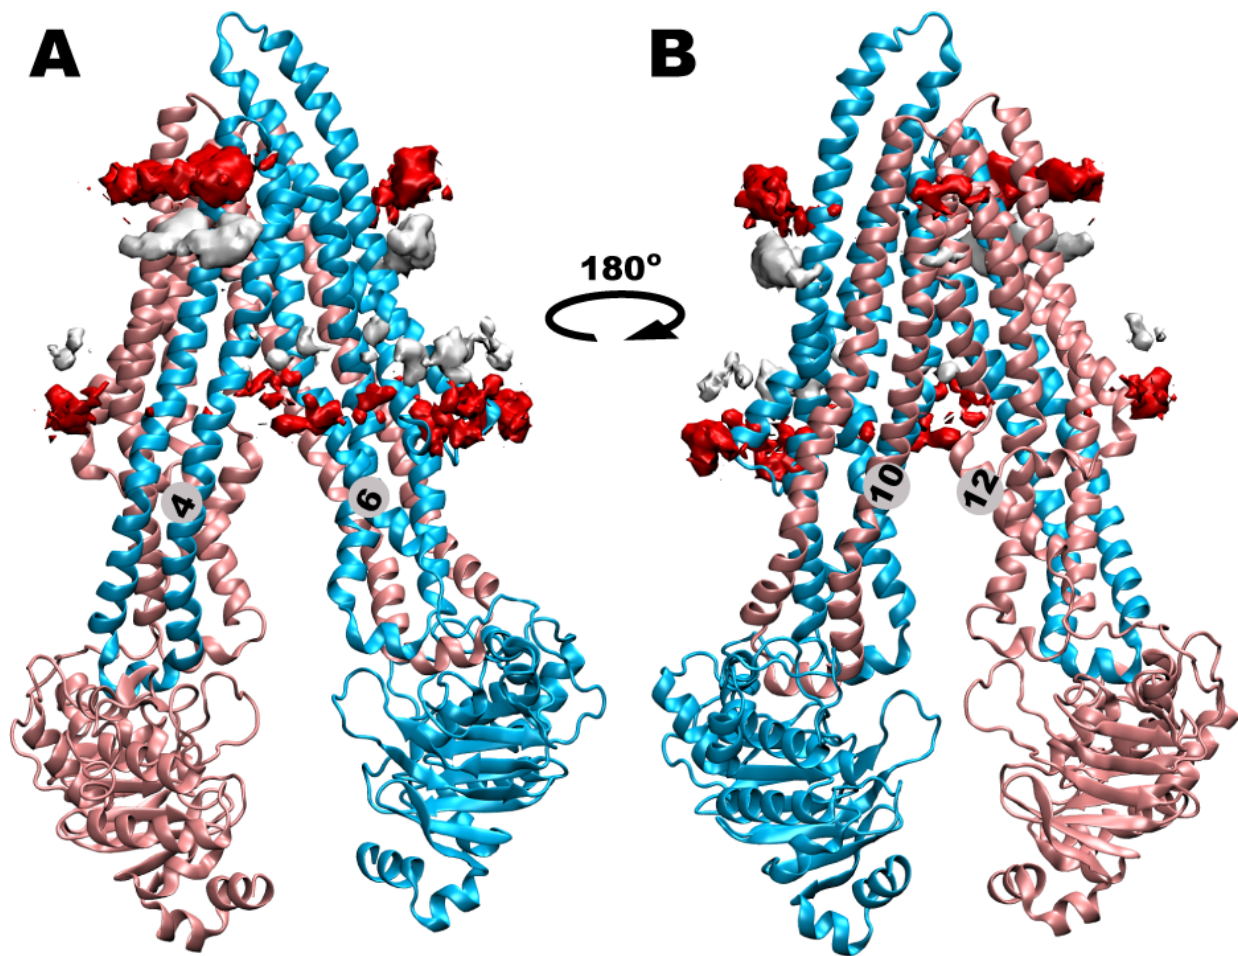

Fig. S6: Occupancy maps of cholesterol molecules. (A) Front and (B) back views of Pgp with occupancy maps of cholesterol molecules calculated using the last 50 ns of *apo* and  $Mg^{2+}/ATP$ -bound simulations in POPC:cholesterol (70:30) bilayer. O3 and C17 atoms of cholesterol were used in occupancy maps calculations and shown as red and white surfaces, respectively (see Fig. 1C for atom numbering). Key TM helices (4, 6, 10, 12) are numbered to enable comparison of occupancy densities.

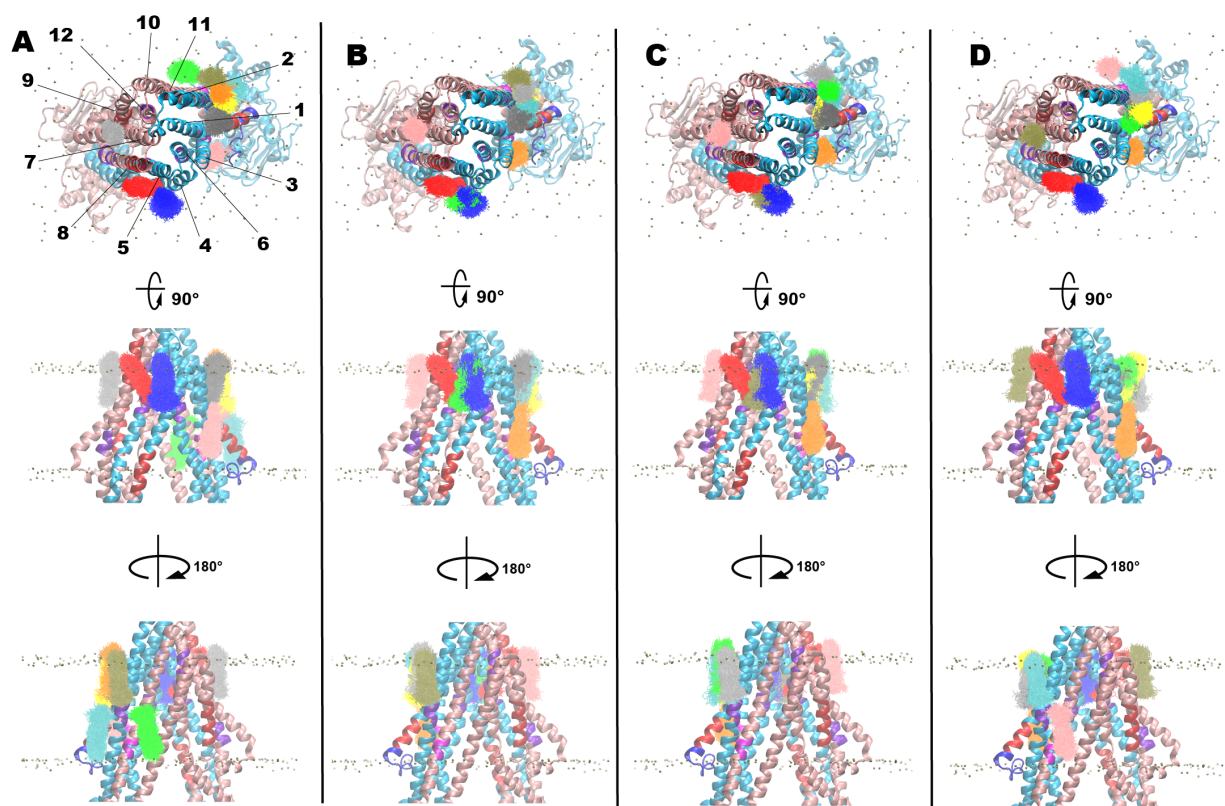

Fig. S7: Convergence analysis of cholesterol molecules located within 4 Å around Pgp obtained using 4 time segments of 200 ns trajectories (each 50 ns). (A-D) A top-down view from the extracellular side showing the top 10 clusters obtained using 4 separate segments of data, with their corresponding rotated side views shown in the middle and bottom rows, respectively. (A) 1-50 ns; (B) 51-100 ns; (C) 101-150 ns; and (D) 151-200 ns time segments of 200 ns trajectories. Each cluster is colored differently and TM helices are labeled using black lines.

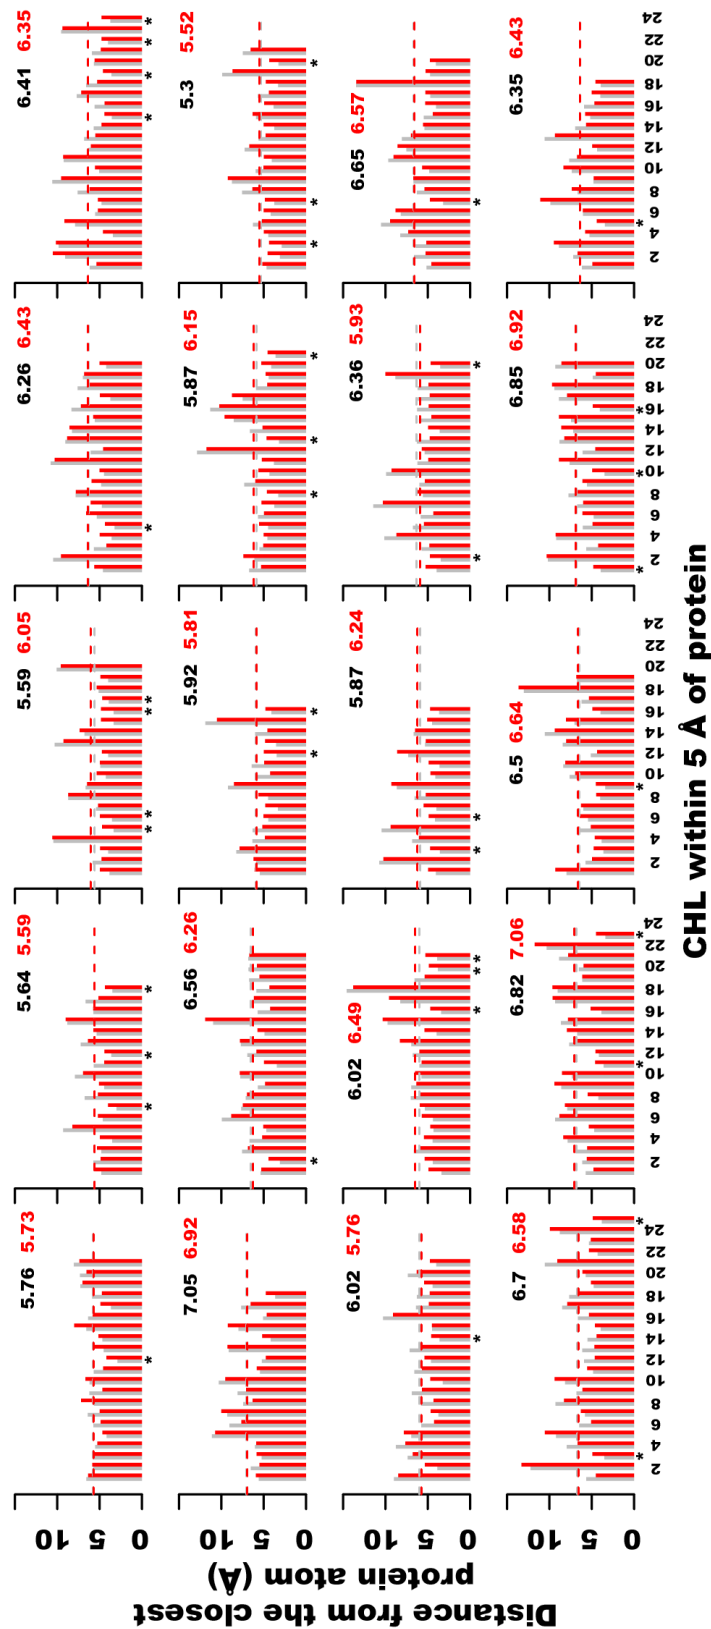

Fig. S8: Binding preference between rough and smooth faces of cholesterol molecules to Pgp in its *apo* form. Calculated center-of-mass distance profiles between rough and smooth faces of cholesterol and the closest atom of Pgp are shown in gray and red color bars, respectively (see Fig. 4A). X-axis lists the number of cholesterol molecules present within 5Å of the protein and selected for this analysis. Mean distance values are provided in black and red for the rough and smooth faces, respectively. Asterisks denote the sandwiched cholesterol between protein atoms.



Table S1: Results of the clustering analysis showing number of cholesterols present in each of the top 30 clusters and their membrane locations, along with the nearby recognition motifs for these clusters. Last 50 ns of simulation data of *apo* and  $Mg^{2+}$ /ATP-bound systems in POPC:cholesterol (70:30) bilayer are used in these calculations.

| Cluster No. | # of cholesterols | TM helices | Leaflet | Recognition Motif    |
|-------------|-------------------|------------|---------|----------------------|
| 1           | 915               | 4, 5       | Extra   | hCRAC2               |
| 2           | 805               | 4, 5, 8    | Extra   | CARC3, hCRAC2        |
| 3           | 502               | 1, 2       | Intra   | CARC1, hCRAC1        |
| 4           | 379               | 1, 3, 6    | Extra   | hCARC1               |
| 5           | 348               | 1, 2       | Extra   | hCARC1               |
| 6           | 332               | 7, 8, 9    | Extra   | CARC3, CARC4         |
| 7           | 326               | 1, 2       | Extra   | hCRAC1               |
| 8           | 315               | 1, 2       | Extra   | hCRAC1               |
| 9           | 276               | 10, 11     | Intra   | hCARC2               |
| 10          | 273               | 2, 11      | Extra   | hCRAC1               |
| 11          | 255               | 7, 8, 9    | Extra   | CARC3, CARC4         |
| 12          | 247               | 2, 11      | Intra   | hCRAC1               |
| 13          | 245               | 5, 6       | Extra   | hCRAC2               |
| 14          | 241               | 1, 3, 6    | Intra   | CRAC1, CARC1, hCARC1 |
| 15          | 234               | 4, 5       | Extra   | hCRAC2               |
| 16          | 226               | 3, 6       | Intra   | hCARC1               |
| 17          | 205               | 4, 6       | Intra   | CARC2, hCRAC3        |
| 18          | 193               | 1, 3, 6    | Intra   | CRAC1, CARC1, hCARC1 |
| 19          | 190               | 4, 6       | Intra   | CARC2, hCRAC3        |
| 20          | 190               | 7, 9       | Extra   | CARC4                |
| 21          | 181               | 2, 11      | Extra   | hCRAC1               |
| 22          | 178               | 1, 3, 6    | Intra   | CRAC1, CARC1, hCARC1 |
| 23          | 171               | 1          | Intra   | CRAC1, CARC1         |
| 24          | 171               | 2          | Extra   | hCRAC1               |
| 25          | 161               | 3, 4, 6    | Extra   | hCRAC3               |
| 26          | 160               | 4, 5       | Extra   | hCRAC2               |
| 27          | 155               | 4          | Intra   | CARC2                |
| 28          | 153               | 5, 8       | Extra   | hCRAC2, CARC3        |
| 29          | 147               | 9, 10      | Intra   | CARC4                |
| 30          | 147               | 7, 9       | Intra   | CARC4                |
